# Supplementary figures and images for: Nanobodies: site-specific labeling for super-resolution imaging, rapid epitope-mapping and native protein complex isolation
Source: eLife journal article supplement (doi:10.7554/elife.11349), 2015-12-03

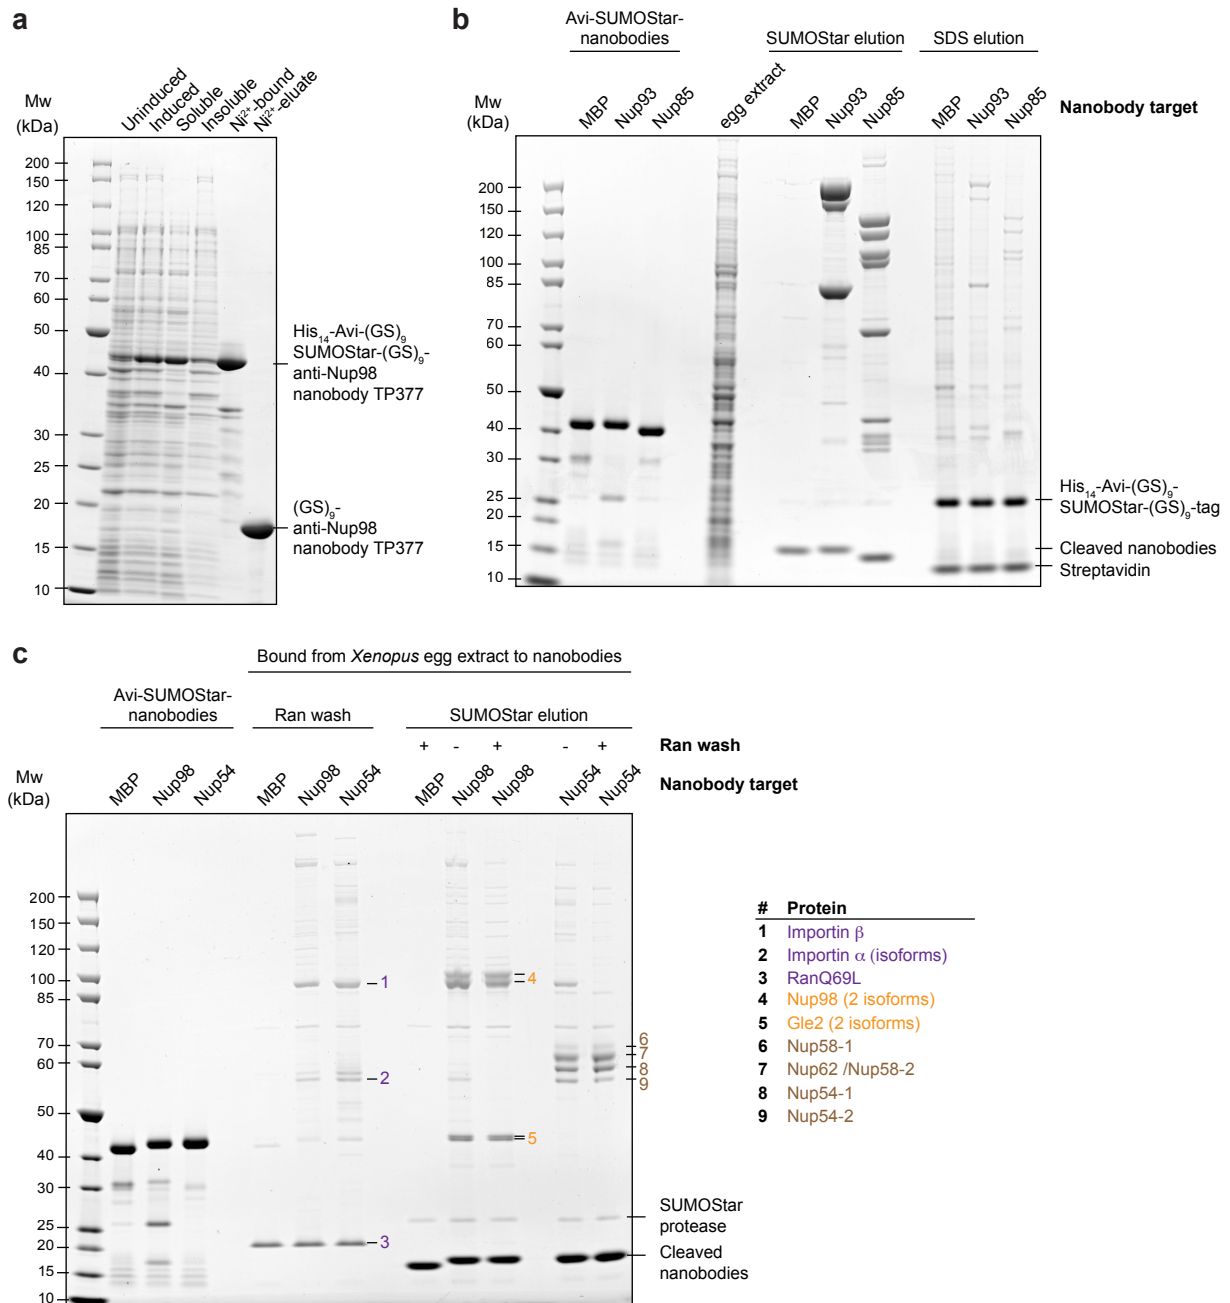

Figure 2 - figure supplement 1., Pleiner et al.

Supplement: supp [file elife_poa_e11349_Figure_2_figure_supplement_1.pdf › elife_poa_e11349_Figure_2_figure_supplement_1.pdf]

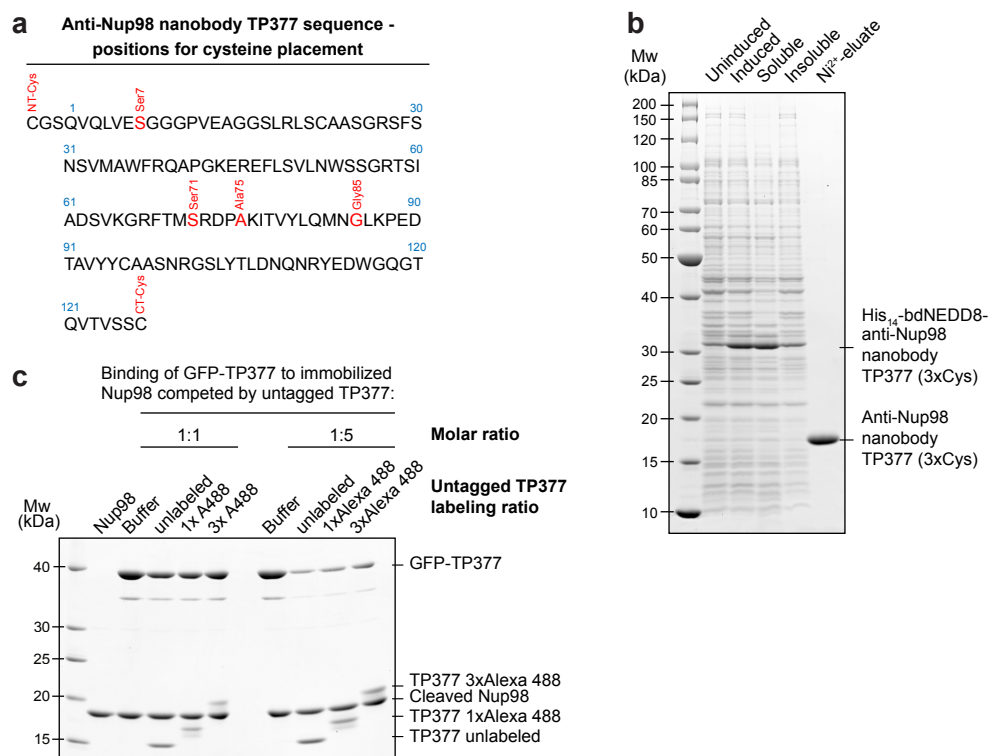

**Figure 5 - figure supplement 1., Pleiner et al.**

Supplement: supp [file elife_poa_e11349_Figure_5_figure_supplement_1.pdf › elife_poa_e11349_Figure_5_figure_supplement_1.pdf]

MS/MS spectra of crosslinks between Nup93 and nanobodies

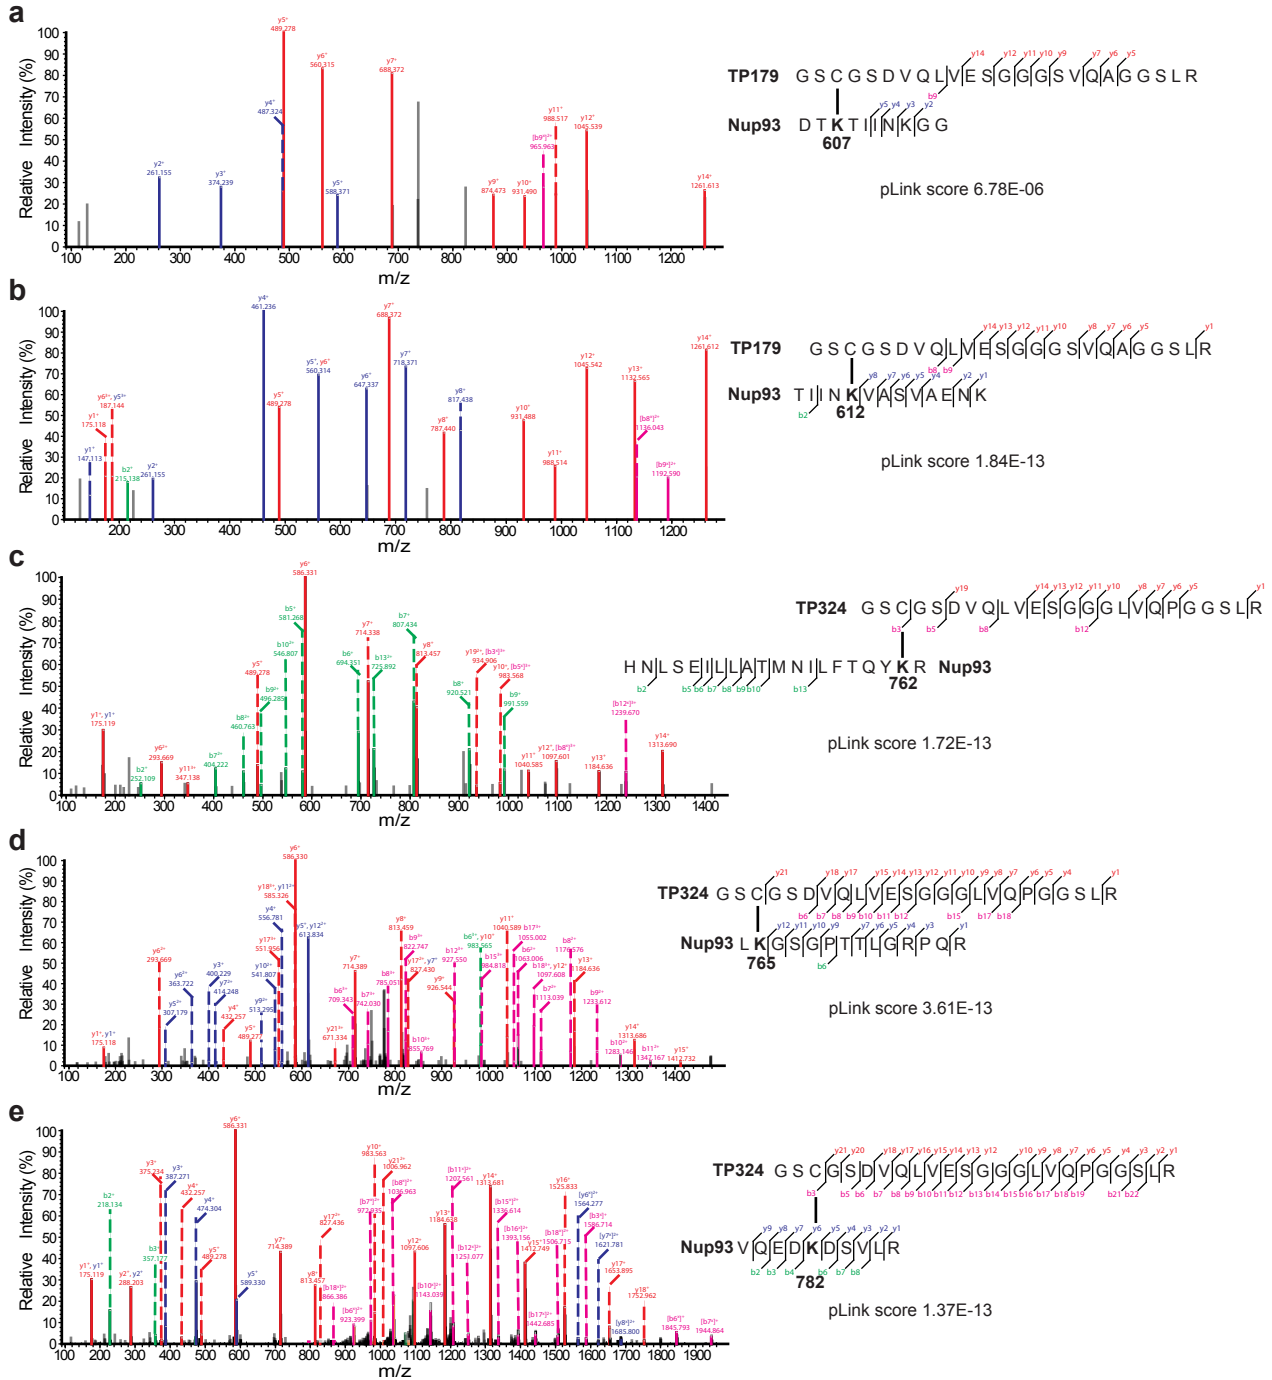

Figure 8 - figure supplement 1., Pleiner et al.

Supplement: supp [file elife_poa_e11349_Figure_8_figure_supplement_1.pdf › elife_poa_e11349_Figure_8_figure_supplement_1.pdf]
